# Supplementary material for: Photocatalytic production of H2O2 from wastewater under visible light by chlorine and ZnIn2S4 co-decorated TpPa-1
Source: Royal Society of Chemistry journal article supplement (doi:10.1039/d3cy01571h), 2023-12-20
Supplement: d3cy01571h1.pdf [file d3cy01571h1.pdf]

## Supporting Information

### Photocatalytic production of H<sub>2</sub>O<sub>2</sub> from wastewater under visible light by chlorine and ZnIn<sub>2</sub>S<sub>4</sub> co-decorated TpPa-1

Guanglu Xia,<sup>a</sup> Jianhao Qiu,<sup>a,b,\*</sup> Dingliang Dai,<sup>a</sup> Yong Tang,<sup>a</sup> Zhonghao Wu,<sup>a</sup> Jianfeng Yao<sup>a,\*</sup>

<sup>a</sup> Jiangsu Co-Innovation Center of Efficient Processing and Utilization of Forest Resources, College of Chemical Engineering, Nanjing Forestry University, Nanjing 210037, China.

<sup>b</sup> Dehua Tubao New Decoration Material Co., Ltd., Deqing 313299, China.

\*Corresponding authors.

Email: [jhq@njfu.edu.cn](mailto:jhq@njfu.edu.cn) (JQ); [jfyao@njfu.edu.cn](mailto:jfyao@njfu.edu.cn) (JY)

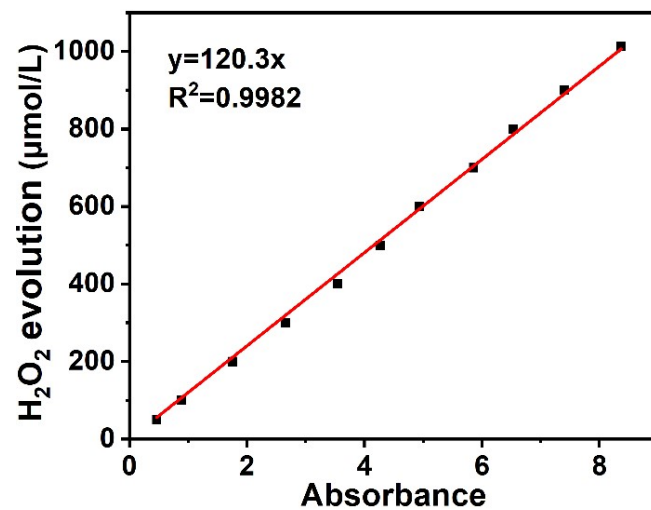

**Fig. S1** The standard curve of H<sub>2</sub>O<sub>2</sub> concentration based on the iodometry.

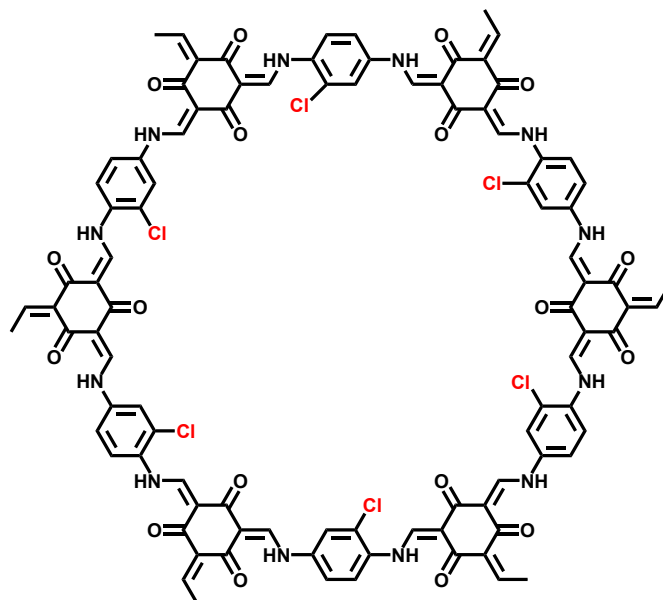

**Fig. S2** Chemical structural formulas of TpPa-Cl.

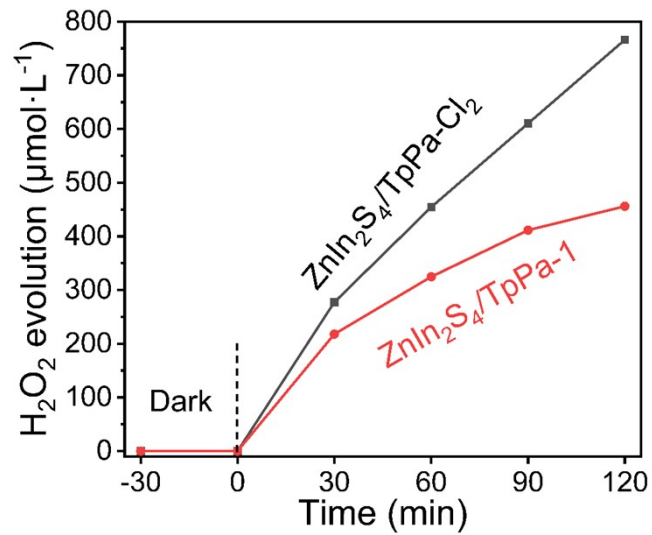

**Fig. S3** Photocatalytic evolution of H<sub>2</sub>O<sub>2</sub> over ZTC-40 and ZnIn<sub>2</sub>S<sub>4</sub>/TpPa-1 with the same ZnIn<sub>2</sub>S<sub>4</sub> ratio of 40%.

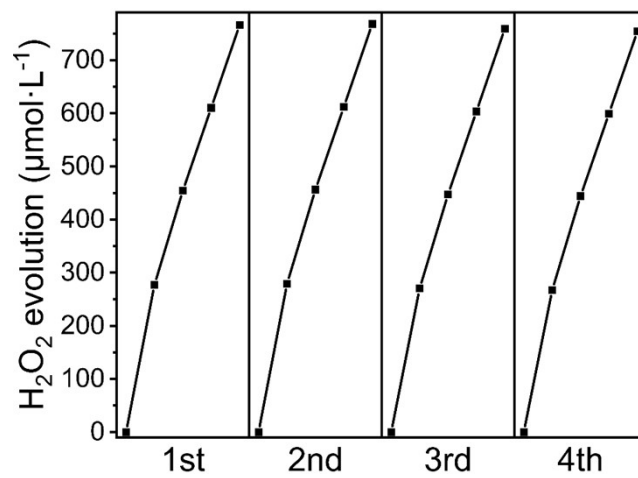

**Fig. S4** Cycle tests of ZTC-40 for photocatalytic H<sub>2</sub>O<sub>2</sub> evolution.

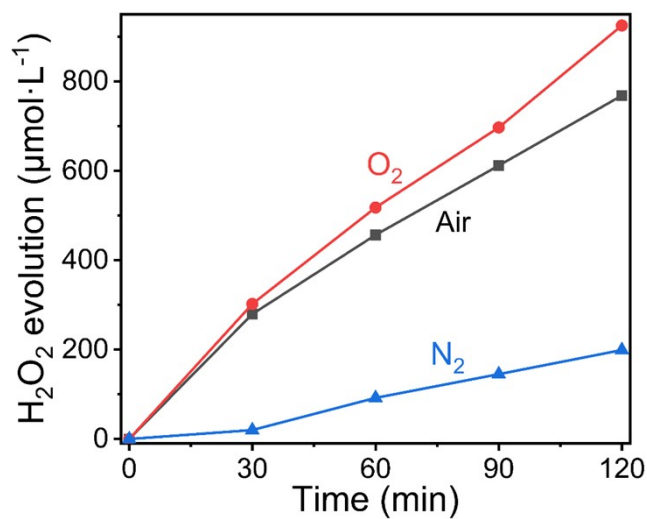

**Fig. S5** Photocatalytic H<sub>2</sub>O<sub>2</sub> evolution in ambient air, O<sub>2</sub> and N<sub>2</sub> over ZTC-40.

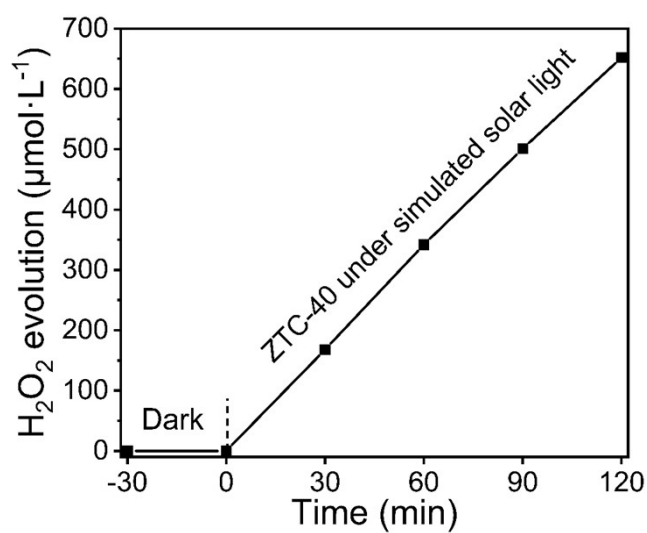

**Fig. S6** Photocatalytic evolution of H<sub>2</sub>O<sub>2</sub> over ZTC-40 under simulated solar light (light filter: AM1.5, light intensity: 100 mW·cm<sup>-1</sup>).

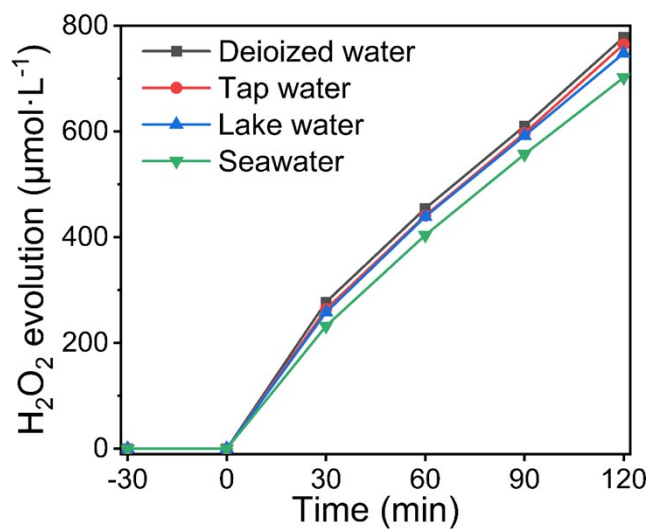

**Fig. S7** Photocatalytic H<sub>2</sub>O<sub>2</sub> evolution in different water over ZTC-40.

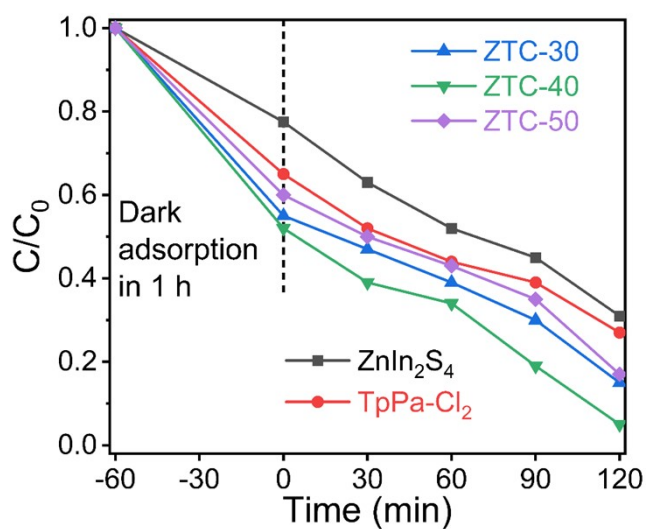

**Fig. S8** Photocatalytic tetracycline degradation over TpPa-Cl<sub>2</sub>, ZnIn<sub>2</sub>S<sub>4</sub>, ZTC-30, ZTC-40 and ZTC-50.

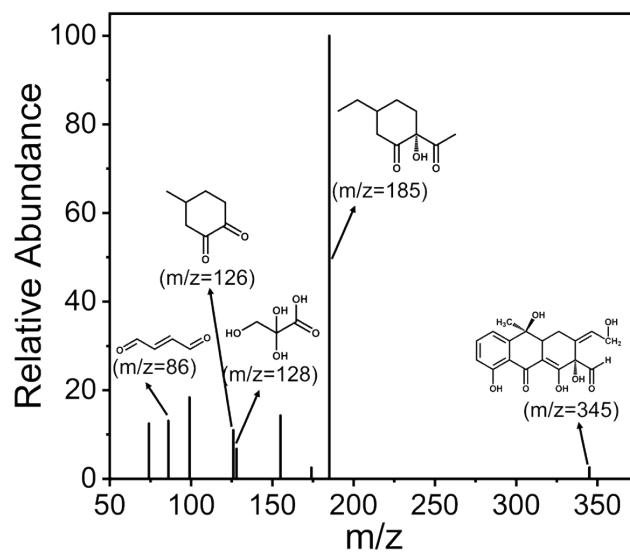

**Fig. S9** Mass spectrum of tetracycline degradation products over ZTC-40.

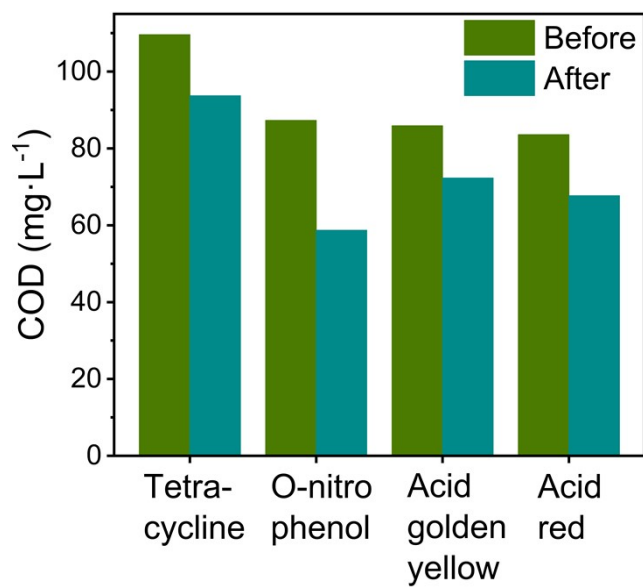

**Fig. S10** COD of tetracycline, o-nitrophenol, acid golden yellow and acid red before and after photocatalysis over ZTC-40.

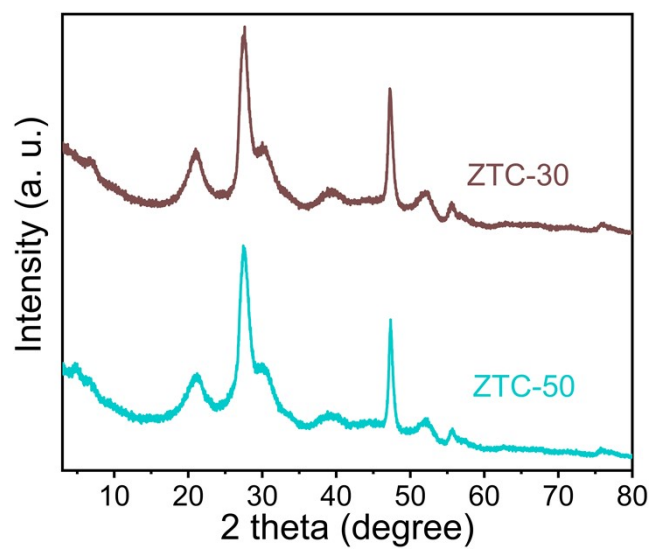

**Fig. S11** XRD patterns of ZTC-30 and ZTC-50.

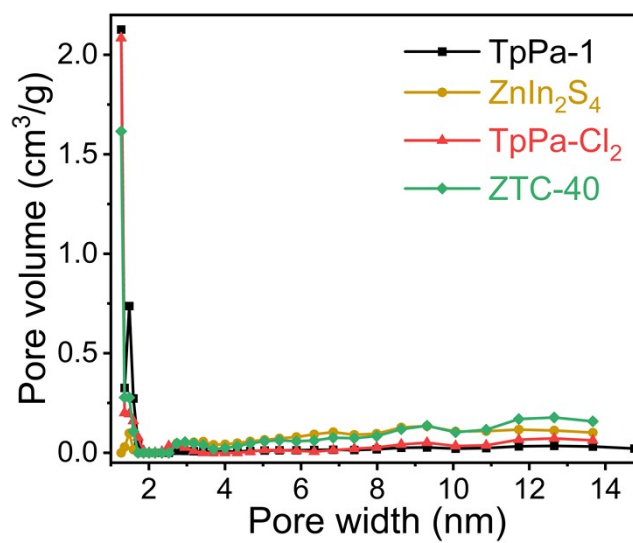

**Fig. S12** Pore size distribution curves of TpPa-1, TpPa-Cl<sub>2</sub>, ZnIn<sub>2</sub>S<sub>4</sub> and ZTC-40.

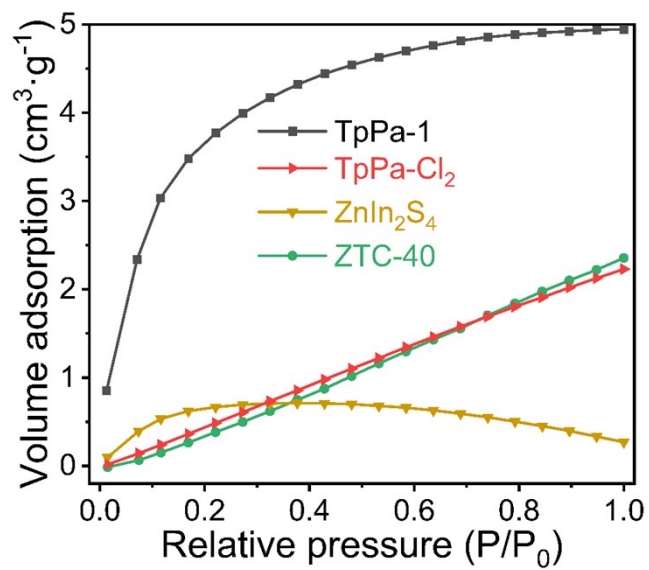

**Fig. S13** O<sub>2</sub> adsorption isotherms of TpPa-1, TpPa-Cl<sub>2</sub>, ZnIn<sub>2</sub>S<sub>4</sub> and ZTC-40.

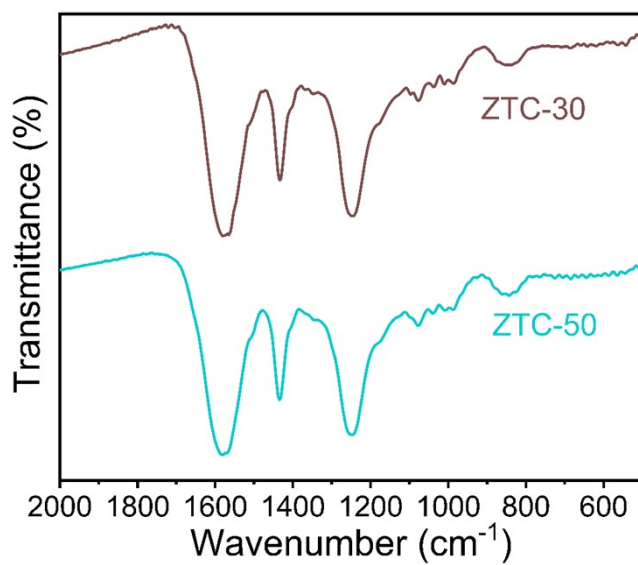

**Fig. S14** FTIR spectra of ZTC-30 and ZTC-50.



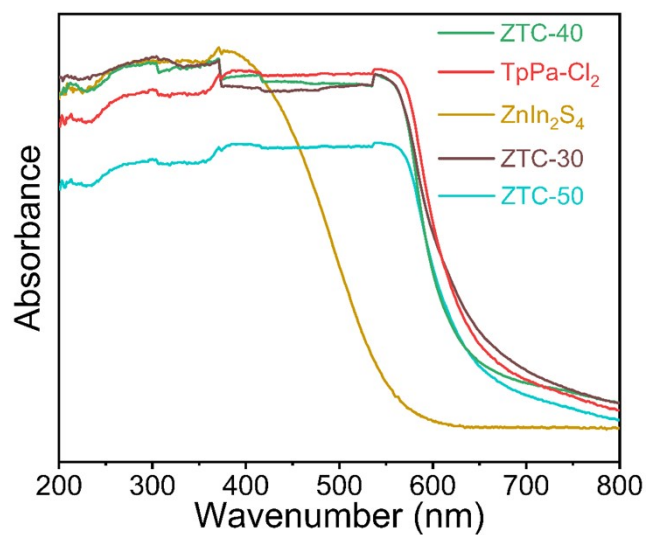

**Fig. S15** UV-vis DRS of TpPa-Cl<sub>2</sub>, ZnIn<sub>2</sub>S<sub>4</sub>, ZTC-30, ZTC-40 and ZTC-50.

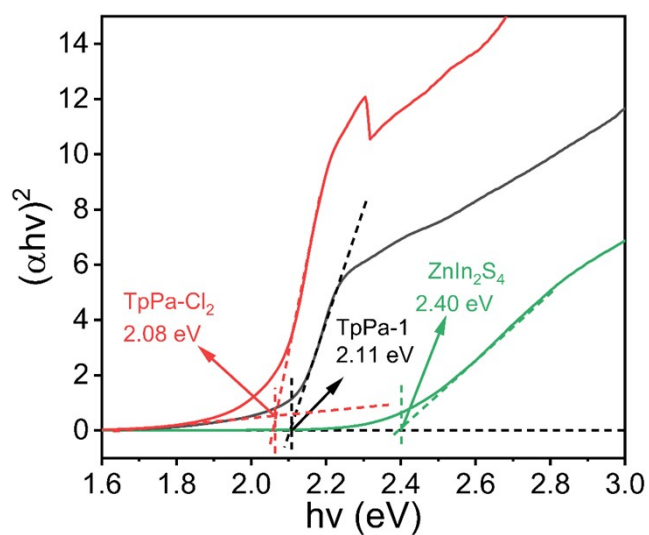

**Fig. S16**  $(\alpha h\nu)^2$  vs  $h\nu$  curves of ZnIn<sub>2</sub>S<sub>4</sub>, TpPa-1 and TpPa-Cl<sub>2</sub>.

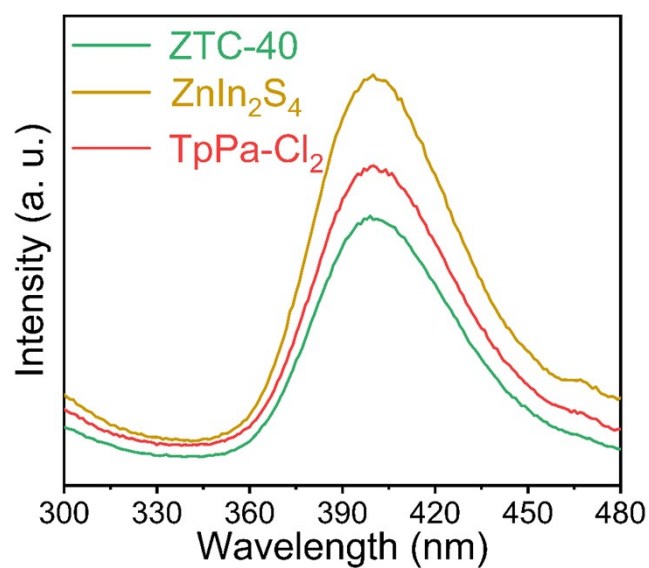

**Fig. S17** PL spectra of TpPa-Cl<sub>2</sub>, ZnIn<sub>2</sub>S<sub>4</sub> and ZTC-40.

**Table S1** Data comparison of photocatalytic H<sub>2</sub>O<sub>2</sub> production with references.

| Photocatalyst                                             | Light | Sacrificial agent | Gas            | Production rate<br>( $\mu\text{mol}\cdot\text{g}^{-1}\cdot\text{h}^{-1}$ ) | Ref. |
|-----------------------------------------------------------|-------|-------------------|----------------|----------------------------------------------------------------------------|------|
| g-C <sub>3</sub> N <sub>4</sub> /PDI                      | Vis   | No                | O <sub>2</sub> | 700                                                                        | S1   |
| TiO <sub>2</sub>                                          | UV    | Benzyl alcohol    | O <sub>2</sub> | 500                                                                        | S2   |
| BTEA-COF                                                  | Vis   | Ethanol           | Air            | 780                                                                        | S3   |
| ZnIn <sub>2</sub> S <sub>4</sub> /TiO <sub>2</sub>        | Vis   | Isopropanol       | Air            | 1181                                                                       | S4   |
| MIL-88B-NH <sub>2</sub> @ZnIn <sub>2</sub> S <sub>4</sub> | Vis   | No                | Air            | 209                                                                        | S5   |
| ZnIn <sub>2</sub> S <sub>4</sub> /TpPa-1                  | Vis   | No                | Air            | 450                                                                        | Here |
| ZnIn <sub>2</sub> S <sub>4</sub> /TpPa-Cl <sub>2</sub>    | Vis   | No                | Air            | 766                                                                        | Here |

## Reference

- S1 SY. Shiraishi, S. Kanazawa, Y. Kofuji, H. Sakamoto, S. Ichikawa, S. Tanaka and T. Hirai, *Angew. Chem. Int. Edit.*, 2014, **53**, 13454-13459.
- S2 Y. Shiraishi, S. Kanazawa, D. Tsukamoto, A. Shiro, Y. Sugano and T. Hirai, *ACS Catal.*, 2013, **3**, 2222-2227.
- S3 L. Zhai, Z. Xie, C.-X. Cui, X. Yang, Q. Xu, X. Ke, M. Liu, L.-B. Qu, X. Chen and L. Mi, *Chem. Mater.*, 2022, **34**, 5232-5240.
- S4 J. Hu, T. Yang, J. Chen, X. Yang, J. Qu and Y. Cai, *Chem. Eng. J.*, 2022, **430**, 133039.
- S5 M. Liu, Z. Xing, H. Zhao, S. Song, Y. Wang, Z. Li and W. Zhou, *J. Hazard. Mater.*, 2022, **437**, 129436.
